# Supplementary material for: Comparative transcriptomic, epigenomic and immunological analyses identify drivers of disparity in high-grade serous ovarian cancer
Source: Springer Nature journal article supplement (doi:10.1038/s41525-024-00448-2), 2024-12-02

## Supplementary Figures and Tables

### Comparative Transcriptomic, Epigenomic and Immunological Analyses Identify Drivers of Disparity in High-Grade Serous Ovarian Cancer

Hao Huang, Russel Keathley, Ujin Kim, Horacio Cardenas, Ping Xie, Jianjun Wei, Ernst Lengyel, Kenneth P Nephew, Guangyuan Zhao, Zhen Fu, Emma L Barber, Masha Kocherginsky, Victoria Bae-Jump, Bin Zhang, Daniela Matei

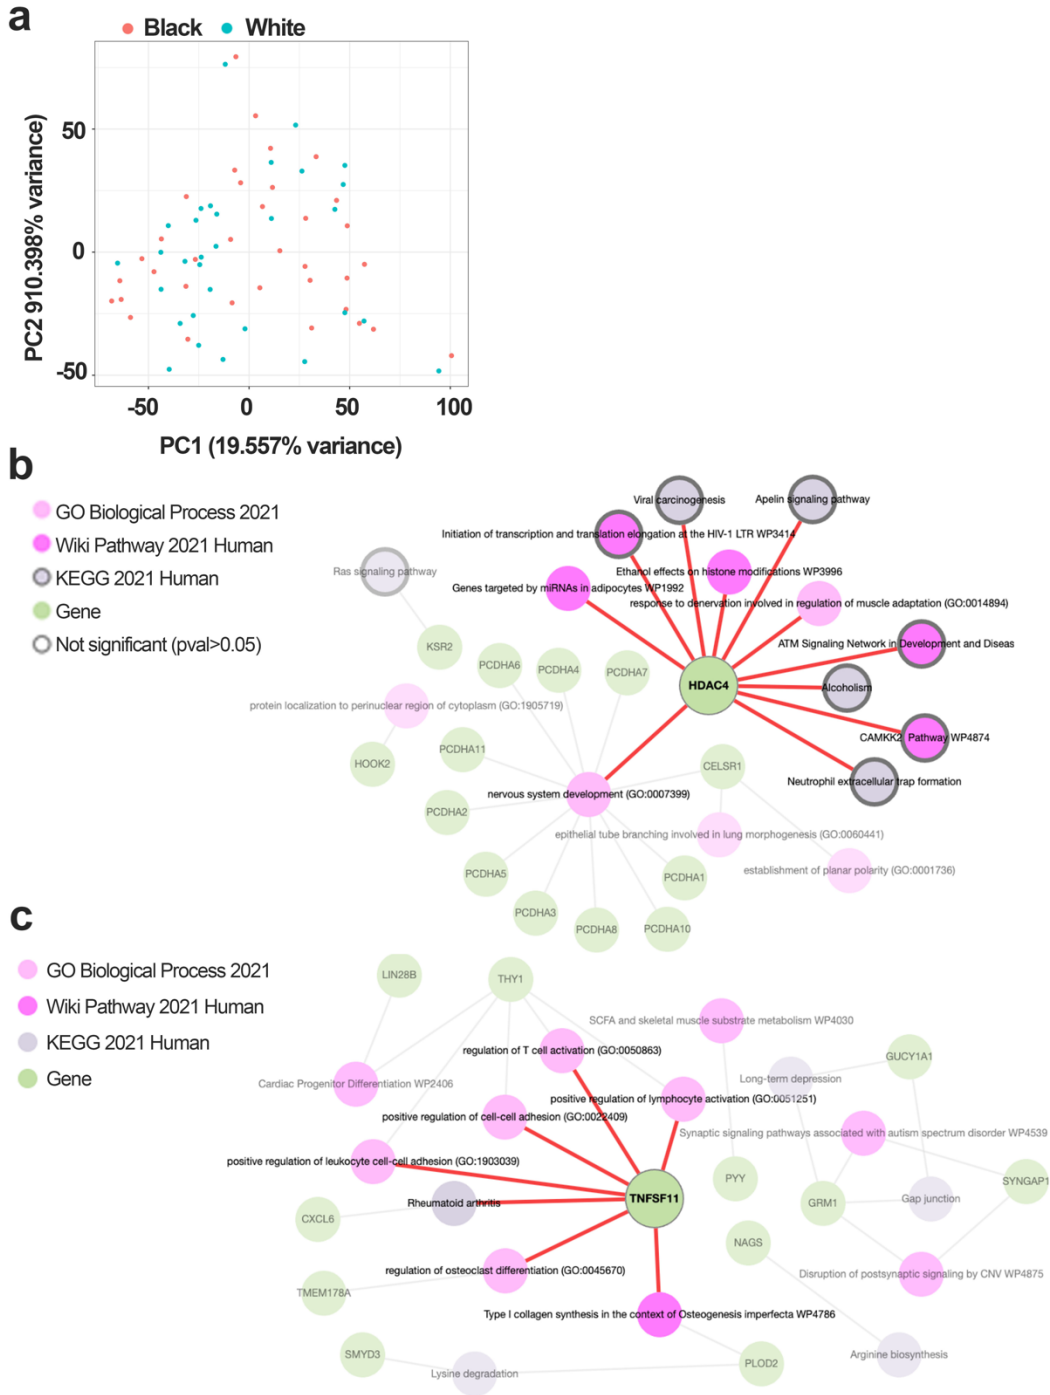

**Supplementary Figure 1** Network analysis conducted using three foundational pathway sets (GO Biological Process, KEGG, and Wiki Pathways) reveals connectivity between genes with differential DNA methylation changes and enriched pathways. **a**, PCA of DNA methylation array data from all samples ( $n = 66$  patients). **b**, Pathway enrichment for hypomethylated genes in Black patients using the open website tool Enrichr Knowledge Graph (Enrichr-KG) (<https://maayanlab.cloud/enrichr-kg>). **c**, Pathway enrichment for hypermethylated genes in Black patients using Enrichr-KG.

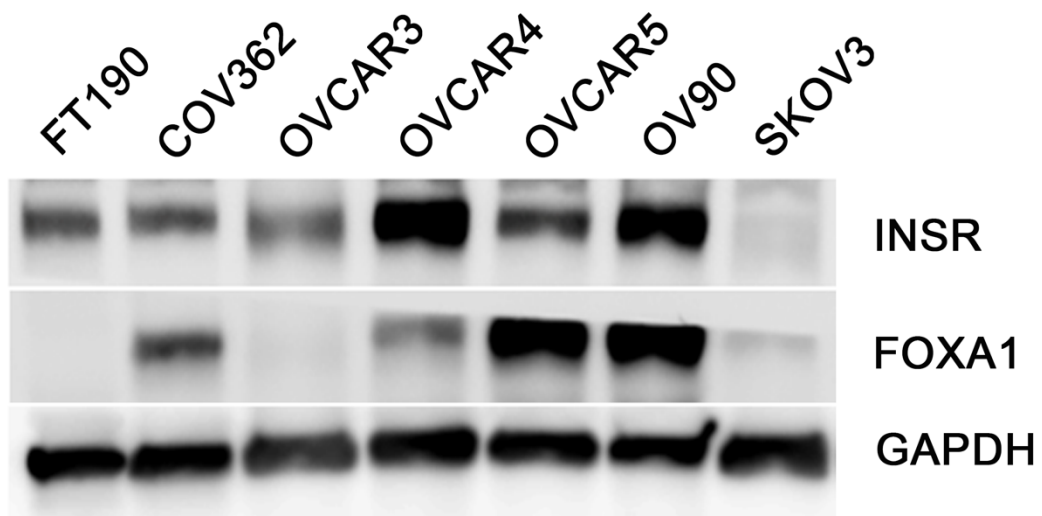

**Supplementary Figure 2** Western blot for INSR, FOXA1, and the housekeeping protein GAPDH across OC cell lines and fallopian tube epithelial cells FT190.

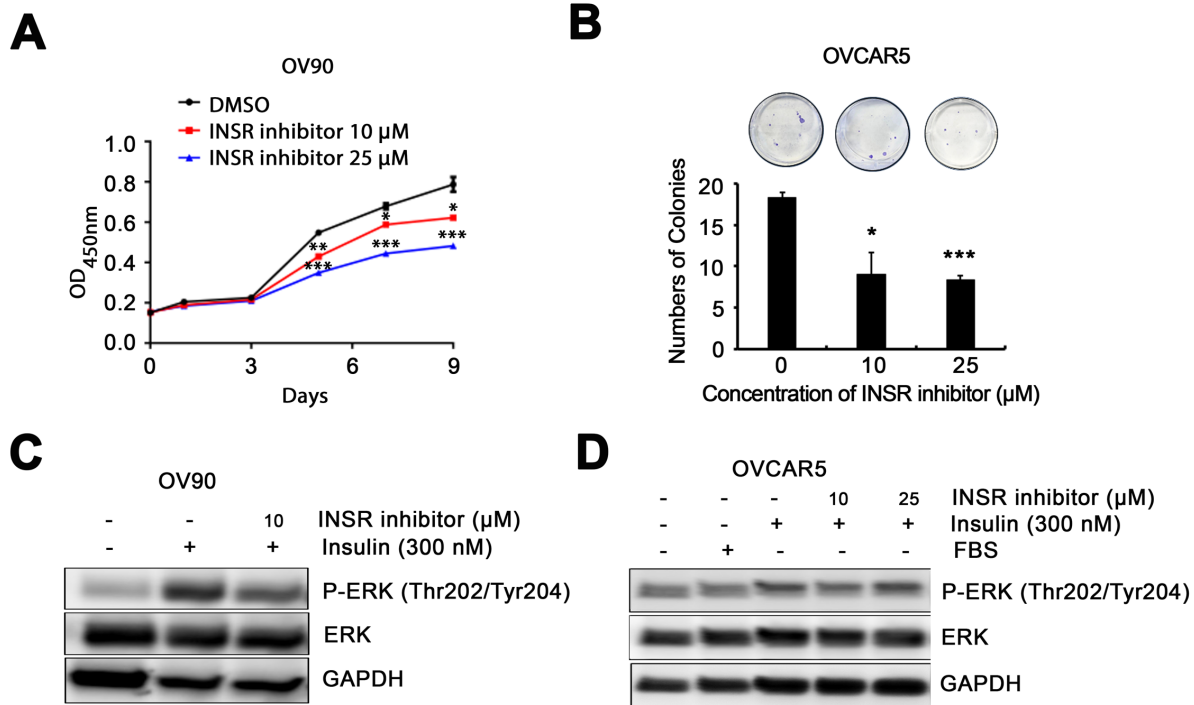

**Supplementary Figure 3** Effects of INSR inhibitor (HNMPA-(AM)3) in ovarian cancer cells. **a**, Proliferation assay shows the effects of the INSR inhibitor at 10 and 25  $\mu$ M on OVCAR5 cells over approximately 10 days. The error bars are defined as mean  $\pm$  SD, with  $n=3$ , \* denote  $p < 0.05$ , \*\* denote  $p < 0.01$ , \*\*\* denote  $p < 0.001$ . **b**, Colony-forming assay (CFA) revealed the growth of OVCAR5 cells treated with 10 and 25  $\mu$ M INSR inhibitor. Bar graph illustrates mean numbers of colonies  $\pm$  SEM. \* denote  $p < 0.05$ , \*\*\* denote  $p < 0.001$ . **c**, **d**, Western blotting illustrates total and phosphorylated ERK after treatment with FBS, insulin, or insulin plus the INSR inhibitor in OV90 cells (**c**) and OVCAR5 cells (**d**).

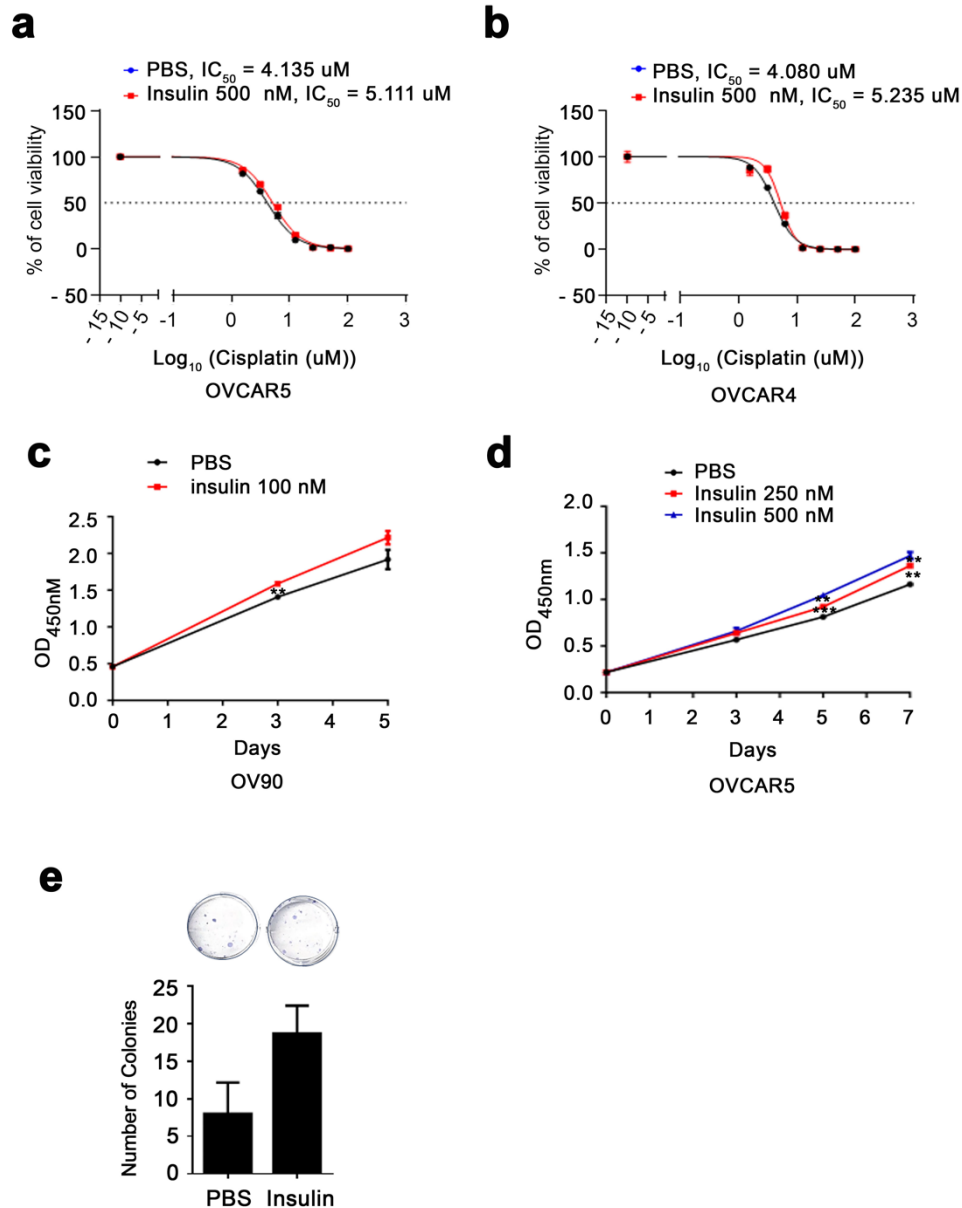

**Supplementary Figure 4** Effects of insulin in ovarian cancer cells. **a**, A cell viability assay measured the  $IC_{50}$  for cisplatin response in OVCAR5 cells treated with either 500 nM insulin or PBS, under varying concentrations of cisplatin. **b**, A cell viability assay identified the response of OVCAR4 cells to cisplatin after treatment with either PBS or 500 nM insulin. The  $IC_{50}$  values are indicated. **c**, Proliferation assay using a CCK8 assay kit was conducted on OV90 cells treated with 100 nM insulin from 0 to 6 days. The error bars are defined as mean  $\pm$  SD, with  $n = 3$ , \*\* denote  $p < 0.01$ . **d**, A proliferation assay in OVCAR5 cells treated with two different concentrations of insulin over an 8-day period was performed. The error bars are defined as mean  $\pm$  SD, with  $n = 3$ , \*\* denote  $p < 0.01$ , \*\*\* $p < 0.001$ . **e**, A colony-forming assay (CFA) determined the growth of OVCAR5 cells treated with insulin. Quantification is provided below. Bar graph illustrates mean numbers of colonies  $\pm$  SEM.

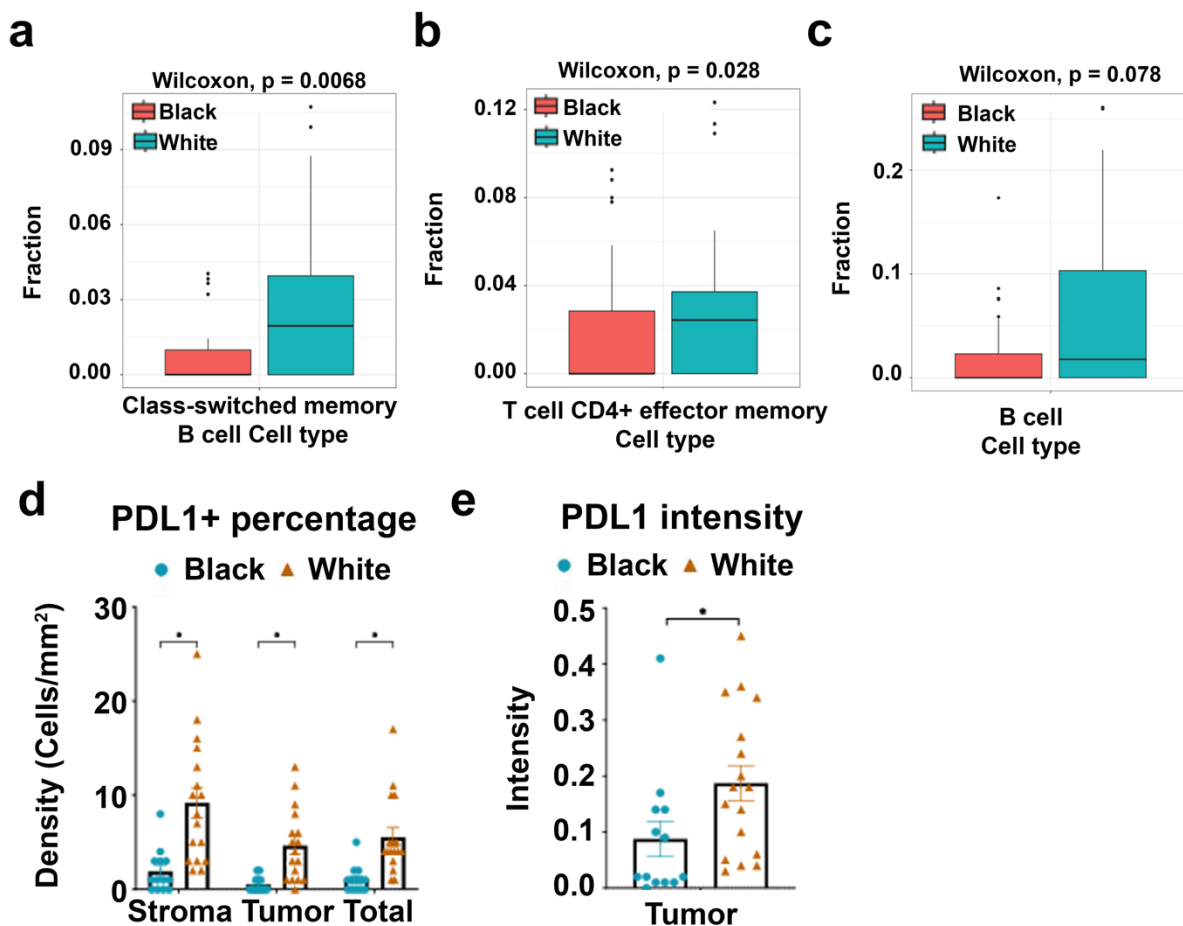

**Supplementary Figure 5** Comparative analysis of immune cell populations in Black and White cohorts. **a, b, c**, A bar graph showed the fraction of class-switched memory B cells in Black and White patients (a), Fraction of T cell CD4+ effector memory in Black and White cohorts (b), and fraction of B cells in Black and White cohorts (c). Statistical significance was determined by using the Wilcoxon test, with p-values indicated. **d, e**, PDL1 level was measured by multiplex IHC in stromal and tumor tissues between Black and White ovarian cancer patients. Bar graphs (means  $\pm$  SE,  $n=15$  and  $17$ , respectively) show the percentage of positive PDL1 in stromal, tumor, and total cell populations (d), and intensity of PDL1 protein in tumor area (e). \* denote  $p < 0.05$ .

**Supplementary Table 1. Patients' characteristics**

| <b>Patients</b> | <b>Source</b> | <b>Race</b> | <b>Histologic subtype</b> | <b>Age</b> | <b>BMI</b> | <b>Mutation</b> | <b>Year of diagnosis,</b> | <b>Stage of disease</b> |
|-----------------|---------------|-------------|---------------------------|------------|------------|-----------------|---------------------------|-------------------------|
| W1              | NU            | White       | HGSOC                     | 62         | 23.61      | Negative        | 2016                      | IIIC                    |
| W2              | NU            | White       | HGSOC                     | 58         | 28.01      | N/A             | 2017                      | N/A                     |
| W3              | NU            | White       | HGSOC                     | 55         | 25.09      | Negative        | 2017                      | N/A                     |
| W4              | NU            | White       | HGSOC                     | 68         | 27.42      | Negative        | 2017                      | IIIC                    |
| W5              | NU            | White       | HGSOC                     | 60         | 33.25      | Negative        | 2018                      | IVA                     |
| W6              | NU            | White       | HGSOC                     | 76         | 34.18      | Negative        | 2018                      | IVB                     |
| W7              | NU            | White       | HGSOC                     | 70         | 25.45      | Negative        | 2018                      | IIIA                    |
| W8              | NU            | White       | HGSOC                     | 63         | 18.00      | Negative        | 2019                      | N/A                     |
| W9              | NU            | White       | HGSOC                     | 64         | 29.26      | Negative        | 2019                      | N/A                     |
| W10             | NU            | White       | HGSOC                     | 73         | 20.65      | Negative        | 2020                      | IIIC                    |
| W11             | NU            | White       | HGSOC                     | 76         | 27.25      | Negative        | 2020                      | IIIB                    |
| W12             | NU            | White       | HGSOC                     | 61         | 26.56      | Negative        | 2019                      | IIIC                    |
| W13             | NU            | White       | HGSOC                     | 71         | 22.89      | Negative        | 2016                      | IVB                     |
| W14             | NU            | White       | HGSOC                     | 72         | 21.96      | Negative        | 2020                      | IIIC                    |
| W15             | NU            | White       | HGSOC                     | 51         | 24.23      | Negative        | 2020                      | IIIC                    |
| W16             | NU            | White       | HGSOC                     | 80         | 26.63      | Negative        | 2020                      | IIIC                    |
| W17             | NU            | White       | HGSOC                     | 52         | 25.19      | Negative        | 2020                      | IIIB                    |
| W18             | NU            | White       | HGSOC                     | 54         | 25.54      | BRCA2+          | 2020                      | IIIB                    |
| W19             | NU            | White       | HGSOC                     | 58         | 21.95      | Negative        | 2021                      | IIIC                    |
| W20             | NU            | White       | HGSOC                     | 70         | 50.52      | Negative        | 2021                      | IC3                     |
| W21             | NU            | White       | HGSOC                     | 72         | 27.56      | Negative        | 2021                      | IIIC                    |
| W22             | NU            | White       | HGSOC                     | 60         | 20.37      | BRCA1+          | 2021                      | IIB                     |
| W23             | NU            | White       | HGSOC                     | 74         | 37.82      | BRCA2+          | 2021                      | IIIC                    |
| W24             | NU            | White       | HGSOC                     | 54         | 22.09      | Negative        | 2021                      | N/A                     |
| W25             | NU            | White       | HGSOC                     | 60         | 34.11      | Negative        | 2021                      | N/A                     |
| W26             | NU            | White       | HGSOC                     | 60         | 23.48      | Negative        | 2021                      | N/A                     |
| W27             | NU            | White       | HGSOC                     | 82         | 23.98      | Negative        | 2021                      | IIIB                    |
| W28             | NU            | White       | HGSOC                     | 65         | 33.84      | Negative        | 2022                      | IIIC                    |
| W29             | NU            | White       | HGSOC                     | 66         | 18.71      | Negative        | 2021                      | IIIC                    |
| W30             | NU            | White       | HGSOC                     | 50         | 26.78      | BRCA2+          | 2021                      | IIIC                    |
| W31             | NU            | White       | HGSOC                     | 63         | 33.42      | Negative        | 2021                      | IA                      |
| B1              | UC            | Black       | HGSOC                     | 65         | 22.86      | BRCA2+          | 2019                      | IIIC                    |
| B2              | UC            | Black       | HGSOC                     | 62         | 36.73      | RAD 51C         | 2019                      | IVB                     |
| B3              | UC            | Black       | HGSOC                     | 66         | 27.81      | Negative        | 2019                      | IIA                     |
| B4              | UC            | Black       | HGSOC                     | 58         | 29.65      | N/A             | 2019                      | IIIC                    |
| B5              | UC            | Black       | HGSOC                     | 60         | 42.39      | N/A             | 2019                      | IIIC                    |
| B6              | UC            | Black       | HGSOC                     | 68         | 28.90      | N/A             | 2013                      | IIIB                    |
| B7              | UC            | Black       | HGSOC                     | 55         | 36.91      | BRCA1           | 2013                      | IIIA1                   |
| B8              | UC            | Black       | HGSOC                     | 69         | 19.57      | N/A             | 2013                      | IVA                     |
| B9              | UC            | Black       | HGSOC                     | 89         | 40.54      | N/A             | 2012                      | IIC                     |
| B10             | UC            | Black       | HGSOC                     | 75         | 25.97      | N/A             | 2012                      | IIIC                    |
| B11             | IU            | Black       | HGSOC                     | 52         | N/A        | N/A             | N/A                       | N/A                     |
| B12             | NU            | Black       | HGSOC                     | 64         | 33.17      | Negative        | 2018                      | IVB                     |
| B13             | IU            | Black       | HGSOC                     | 43         | N/A        | Negative        | 2017                      | IB                      |

|     |     |       |       |     |       |          |      |             |
|-----|-----|-------|-------|-----|-------|----------|------|-------------|
| B14 | IU  | Black | HGSOC | 62  | N/A   | BRCA1+   | 2010 | N/A         |
| B15 | IU  | Black | HGSOC | 68  | N/A   | Negative | 2010 | IIIC (FIGO) |
| B16 | IU  | Black | HGSOC | 54  | N/A   | N/A      | N/A  | N/A         |
| B17 | IU  | Black | HGSOC | 73  | N/A   | Negative | 2016 | N/A         |
| B18 | IU  | Black | HGSOC | 53  | N/A   | N/A      | 2003 | IV          |
| B19 | CHC | Black | HGSOC | 50  | 33.23 | N/A      | 2008 | IIIC        |
| B20 | CHC | Black | HGSOC | 63  | 30.51 | N/A      | 2006 | IIIC        |
| B21 | CHC | Black | HGSOC | 78  | 22.09 | N/A      | 2008 | IIIC        |
| B22 | CHC | Black | HGSOC | 72  | 29.53 | N/A      | 2007 | IIIC        |
| B23 | CHC | Black | HGSOC | 73  | 28.84 | N/A      | 2004 | III         |
| B24 | CHC | Black | HGSOC | 52  | 25.47 | N/A      | 2003 | IVB         |
| B25 | CHC | Black | HGSOC | 62  | 22.89 | N/A      | 2009 | IIIC        |
| B26 | CHC | Black | HGSOC | 36  | 35.89 | N/A      | 2011 | IV          |
| B27 | CHC | Black | HGSOC | 64  | 36.12 | N/A      | 2011 | IIIC        |
| B28 | IU  | Black | HGSOC | N/A | N/A   | N/A      | N/A  | N/A         |
| B29 | CHC | Black | HGSOC | 65  | 25.87 | N/A      | 2008 | IIIC        |
| B30 | CHC | Black | HGSOC | 61  | 62.86 | N/A      | 2008 | IIIC        |
| B31 | UNC | Black | HGSOC | 44  | 36.00 | Negative | 2019 | IIIC        |
| B32 | UNC | Black | HGSOC | 43  | 27.00 | N/A      | 1997 | IV          |
| B33 | UNC | Black | HGSOC | 68  | 31.00 | Negative | 2021 | IIIC        |
| B34 | UNC | Black | HGSOC | 55  | 32.00 | N/A      | 2013 | III         |
| B35 | UNC | Black | HGSOC | 59  | 22.00 | Negative | 2017 | IVB         |

NU: Northwestern University; UC: University of Chicago; IU: Indiana University; UNC: University of North Carolina; CHC: Children's Hospital, Columbus (NRG Oncology). BMI: The body mass index. HGSOC: High-grade serous ovarian carcinoma

**Supplementary Table 2.** Age and BMI for patients whose tumors were analyzed by RNA-seq and DNA methylation

|                      | Age     |         | BMI           |               |
|----------------------|---------|---------|---------------|---------------|
|                      | White   | Black   | White         | Black         |
| <b>Mean</b>          | 64.52   | 61.00   | 27.22         | 32.67         |
| <b>Median</b>        | 63.00   | 61.00   | 26.56         | 31.00         |
| <b>Range</b>         | 50 ~ 82 | 36 ~ 89 | 18.00 ~ 50.52 | 19.57 ~ 62.86 |
| <b># of patients</b> | 31      | 35      | 31            | 27            |
| <b>T-test</b>        | 0.195   |         | 0.060         |               |

**Supplementary Table 3.** List of genes associated with significantly differentially methylated probes in tumors from White vs. Black patients

| Probe_ID   | Diff. b value | P val_adj  | Gene symbol                  |
|------------|---------------|------------|------------------------------|
| cg05586384 | -0.5793491    | 0.00603569 | RTKN2                        |
| rs6426327  | -0.3883189    | 0.01285293 | SMYD3                        |
| rs6982811  | -0.3228529    | 0.03282394 | AC090809.1                   |
| rs213028   | -0.3226392    | 0.04086011 | ECE1                         |
| cg25712921 | -0.247587     | 0.02846044 | AC069547.2;SGMS1             |
| cg10654284 | -0.0648101    | 0.01505879 | LIN28B                       |
| cg21964928 | -0.176245     | 0.04822341 | AC026688.1                   |
| cg16566400 | -0.1667448    | 0.0335294  | THY1;USP2-AS1                |
| cg10708761 | -0.1646829    | 0.03413746 | TMEM178A                     |
| cg02304226 | -0.1348316    | 0.0070414  | AC007608.3                   |
| cg16856049 | -0.1401251    | 0.01309313 | AC026765.3                   |
| cg00555816 | -0.091491     | 0.00570972 | MCF2L                        |
| cg12087371 | -0.110186     | 0.0256779  | CXCL6                        |
| cg22234419 | -0.132927     | 0.02041661 | PLOD2                        |
| cg01777861 | -0.1027179    | 0.00389672 | AC021220.2                   |
| cg01290791 | -0.1310233    | 0.01008587 | LINC01250                    |
| cg00693994 | -0.014974     | 0.00100496 | GUCY1A1                      |
| cg03478199 | -0.0974719    | 0.01136249 | GRM1                         |
| cg01128482 | -0.1106736    | 0.00641514 | HOXD3                        |
| cg10304824 | -0.0982653    | 0.00641514 | HAGLR;HOXD3                  |
| cg03733219 | -0.0713332    | 0.00091347 | SPRED3                       |
| cg00919398 | -0.1100047    | 0.00115287 | SVOPL                        |
| cg01357135 | -0.0962381    | 0.00647833 | PPM1L                        |
| cg00332153 | -0.0961865    | 0.01502427 | BANK1                        |
| cg05180443 | -0.0797915    | 2.4505E-05 | ACSF2;CHAD                   |
| cg02652579 | -0.1078074    | 0.02756402 | CUTA;SYNGAP1                 |
| cg02518216 | -0.0850371    | 0.02773363 | NUAK1                        |
| cg03186333 | -0.0937889    | 0.01053041 | EYA1                         |
| cg04032226 | -0.0892064    | 1.8155E-05 | NAGS;PYY                     |
| cg09745430 | -0.0730596    | 0.04830955 | AL132996.1;BACH2             |
| cg01250603 | -0.0799008    | 0.03859027 | AC010998.1                   |
| cg04536296 | -0.0919352    | 0.00471917 | TNFSF11                      |
| cg06088084 | -0.0132829    | 0.03434901 | BMS1P1;GLUD1P2               |
| cg01422243 | -0.0765988    | 0.00305797 | SPAG6                        |
| cg07655045 | -0.0564927    | 0.00385099 | AC010624.1;AC010624.3;ZNF473 |
| cg07542810 | -0.0798294    | 0.00989037 | AC010457.1                   |
| cg11186858 | 0.1161596     | 0.04566027 | SEC14L1                      |

|            |            |            |                                                                                                   |
|------------|------------|------------|---------------------------------------------------------------------------------------------------|
| cg02898051 | 0.11627631 | 0.04495608 | AC025283.2                                                                                        |
| cg07673080 | 0.11789605 | 0.042711   | HDAC4                                                                                             |
| cg07599507 | 0.12905023 | 0.02426188 | CSMD3                                                                                             |
| cg26161709 | 0.1021996  | 0.02426188 | RNU4-37P                                                                                          |
| cg07363697 | 0.15639785 | 0.00950913 | LINC02684                                                                                         |
| cg02207052 | 0.14857439 | 0.00053575 | CELSR1                                                                                            |
| cg04598224 | 0.1269318  | 0.01736086 | AC008543.1                                                                                        |
| cg01227835 | 0.16479338 | 0.03537051 | AC000372.1                                                                                        |
| cg08067695 | 0.14178413 | 0.00492101 | PCDHGA1;PCDHGA2;PCDHGA3;PCDHGA4;PCDHGA5;PCDHGB1;PCDHGB2                                           |
| cg00598449 | 0.15438901 | 0.02246887 | ARHGEF38                                                                                          |
| cg09852127 | 0.17885926 | 1.8139E-05 | PCDHA1;PCDHA10;PCDHA11;PCDHA12;PCDHA2;PCDHA3;PCDHA4;PCDHA5;PCDHA6;PCDHA7;PCDHA8;PCDHA9            |
| cg13295463 | 0.14003023 | 1.8139E-05 | AC005609.3;PCDHA1;PCDHA10;PCDHA11;PCDHA12;PCDHA2;PCDHA3;PCDHA4;PCDHA5;PCDHA6;PCDHA7;PCDHA8;PCDHA9 |
| cg12945378 | 0.16136908 | 0.01467474 | KSR2                                                                                              |
| cg04657146 | 0.17991003 | 0.02452639 | HOOK2                                                                                             |
| rs10882854 | 0.37429222 | 0.00710803 | LCOR                                                                                              |

**Supplementary Table 4.** List of top 20 upregulated genes in tumors from Black vs White patients.

| Gene symbol | Fold change | <i>P</i> value | FDR      |
|-------------|-------------|----------------|----------|
| TBC1D3D     | 3.873       | 1.36E-06       | 0.00067  |
| MAGEC2      | 3.762       | 9.82E-05       | 0.015673 |
| FOXB1       | 3.596       | 6.74E-07       | 0.000422 |
| MLC1        | 3.277       | 3.16E-09       | 4.45E-06 |
| MUC5AC      | 3.272       | 1.20E-07       | 9.31E-05 |
| RHBG        | 3.215       | 5.10E-08       | 4.41E-05 |
| MUC5B       | 3.129       | 6.09E-07       | 0.000392 |
| JPH3        | 2.858       | 1.06E-08       | 1.19E-05 |
| EEF1A2      | 2.807       | 1.04E-08       | 1.19E-05 |
| SHISA3      | 2.801       | 1.21E-06       | 0.00065  |
| CSF3        | 2.701       | 0.000128803    | 0.018451 |
| ADGRA1      | 2.619       | 7.27E-05       | 0.013199 |
| TOX3        | 2.559       | 0.000310732    | 0.032686 |
| EDN3        | 2.491       | 0.000356273    | 0.035645 |
| PADI1       | 2.472       | 0.000184109    | 0.023284 |
| CHAT        | 2.438       | 3.60E-05       | 0.009319 |
| FOXA1       | 2.427       | 0.000168391    | 0.022039 |
| MB          | 2.426       | 1.05E-05       | 0.003387 |
| NPIPA8      | 2.406       | 1.28E-06       | 0.000668 |
| NOTCH2NLB   | 2.401       | 1.94E-09       | 3.12E-06 |

**Supplementary Table 5.** List of top 20 down-regulated genes in tumors from Black vs White patients.

| Gene symbol | Fold change | <i>P</i> value | FDR      |
|-------------|-------------|----------------|----------|
| FDCSP       | -4.936      | 2.39E-09       | 3.59E-06 |
| GAGE13      | -4.822      | 0.000127       | 0.018451 |
| SEZ6        | -4.330      | 1.38E-17       | 5.16E-14 |
| CTAG1B      | -3.860      | 9.14E-06       | 0.003185 |
| CNMD        | -3.672      | 4.45E-05       | 0.010139 |
| SOX3        | -3.646      | 0.000117       | 0.017807 |
| NPB         | -3.548      | 1.87E-11       | 3.51E-08 |
| KEL         | -3.412      | 2.98E-13       | 6.71E-10 |
| HOXD11      | -3.281      | 6.70E-06       | 0.002557 |
| NXF3        | -3.009      | 3.45E-09       | 4.56E-06 |
| HOXD13      | -3.008      | 0.000297       | 0.03245  |
| MAGEC1      | -2.972      | 0.00034        | 0.034796 |
| CRYGD       | -2.942      | 0.000417       | 0.039806 |
| BCAN        | -2.721      | 4.76E-06       | 0.00188  |
| CD1A        | -2.696      | 3.59E-06       | 0.00147  |
| NPHS1       | -2.694      | 1.20E-06       | 0.00065  |
| CDH12       | -2.675      | 1.67E-05       | 0.004636 |
| OR2I1P      | -2.526      | 2.58E-06       | 0.001117 |
| CPNE4       | -2.465      | 1.37E-06       | 0.00067  |
| PAX5        | -2.454      | 1.49E-05       | 0.004302 |

**Supplementary Table 6.** Patients' characteristics for tumors included in the TMA used for validation

| <b>Source</b> | <b>Race</b> | <b>Age</b> | <b>Histologic subtype</b> | <b>Stage of disease</b> |
|---------------|-------------|------------|---------------------------|-------------------------|
| NU            | Black       | 46         | HGSOC                     | IV                      |
| NU            | Black       | 63         | HGSOC                     | IVA                     |
| NU            | Black       | 64         | HGSOC                     | IVB                     |
| NU            | Black       | 83         | HGSOC                     | IVA                     |
| NU            | Black       | 50         | HGSOC                     | IVA                     |
| NU            | Black       | 62         | HGSOC                     | IIIC                    |
| NU            | Black       | 73         | HGSOC                     | IIIB                    |
| NU            | Black       | 69         | HGSOC                     | IIIC                    |
| NU            | Black       | 63         | HGSOC                     | IIIC                    |
| NU            | Black       | 68         | HGSOC                     | IIIC                    |
| NU            | White       | 71         | HGSOC                     | IVB                     |
| NU            | White       | 62         | HGSOC                     | IIIC                    |
| NU            | White       | 58         | HGSOC                     | IIIA                    |
| NU            | White       | 53         | HGSOC                     | IIIC                    |
| NU            | White       | 60         | HGSOC                     | IVA                     |
| NU            | White       | 65         | HGSOC                     | IVB                     |
| NU            | White       | 76         | HGSOC                     | IVB                     |
| NU            | White       | 64         | HGSOC                     | IIIB                    |
| NU            | White       | 51         | HGSOC                     | IIIC                    |
| NU            | White       | 80         | HGSOC                     | IIIC                    |
| NU            | White       | 52         | HGSOC                     | IIIB                    |
| NU            | White       | 54         | HGSOC                     | IIB                     |
| NU            | White       | 58         | HGSOC                     | IIIC                    |
| NU            | White       | 70         | HGSOC                     | IC3                     |
| NU            | White       | 71         | HGSOC                     | IIIC                    |
| NU            | White       | 60         | HGSOC                     | IIB                     |
| NU            | White       | 74         | HGSOC                     | IIIC                    |
| NU            | White       | 60         | HGSOC                     | IVB                     |
| NU            | White       | 52         | HGSOC                     | IIIC                    |
| NU            | White       | 82         | HGSOC                     | IIIB                    |
| NU            | White       | 63         | HGSOC                     | IA                      |
| NU            | White       | 74         | HGSOC                     | IIIA2                   |

NU: Northwestern University; HGSOC: High-grade serous ovarian carcinoma.

**Supplementary Table 7.** List of primers sequences

| Target gene | Forward primer (5'to 3') | Reverse primer (5'to 3') |
|-------------|--------------------------|--------------------------|
| 18S         | ACCCGTTGAACCCCATTCGTGA   | GCCTCACTAAACCATCCAATCGG  |
| FOXA1       | CTACTCGTACATCTCGCTCATC   | GCTGGTTCTGCCGGTAATA      |
| FOXB1       | TACATCTCGCTGACCGCTAT     | TGCGTGTTCTCCCTGTAGTA     |
| EEF1A2      | ATCGTGGGCGTGAACAAA       | GGTTGTAGCCGATCTTCTTGAT   |
| LDLR        | CTCCCGCCAAGATCAAGAAA     | GTTTGGAGTCAACCCAGTAGAG   |
| SCD1        | ACGATATCTCTAGCTCCTATACC  | GGCATCGTCTCCAACCTTATC    |
| INSR        | CCGGAAGTTACGTCTGATTC     | GTGATGGTGAGGTTGTGTT      |
| NXF3        | GGATACCTCCAGCAACATAAA    | GGGCTTCAGTACCACATAAA     |
| CPNE4       | CCTATCAGAGCTGTCTTCCTA    | CCTCCTTGGTGTTAGTTTCC     |
| WNT16       | CAGTTCAGACACGAGAGATG     | CAGCCATCACAGCATAAAATAAA  |

**Supplementary Table 8.** Antibodies used for multiplex IHC

| Antigen | Dilution | Venders         | Catalog # | Fluorophore |
|---------|----------|-----------------|-----------|-------------|
| CD3     | 5x       | Biocare medical | PP215AA   | Opal 650    |
| CD4     | 1x       | Biocare medical | 104R-27   | Opal 520    |
| CD8     | 200x     | Cell signaling  | 70306S    | Opal 540    |
| FOXP3   | 100x     | BioLegend       | 320102    | Opal 570    |
| PD-L1   | 100x     | Cell signaling  | 13684S    | Opal 620    |
| PanCK   | 200x     | abcam           | ab7753    | Opal 690    |

## Supplementary Material

Unedited full blot images for Figure 4b

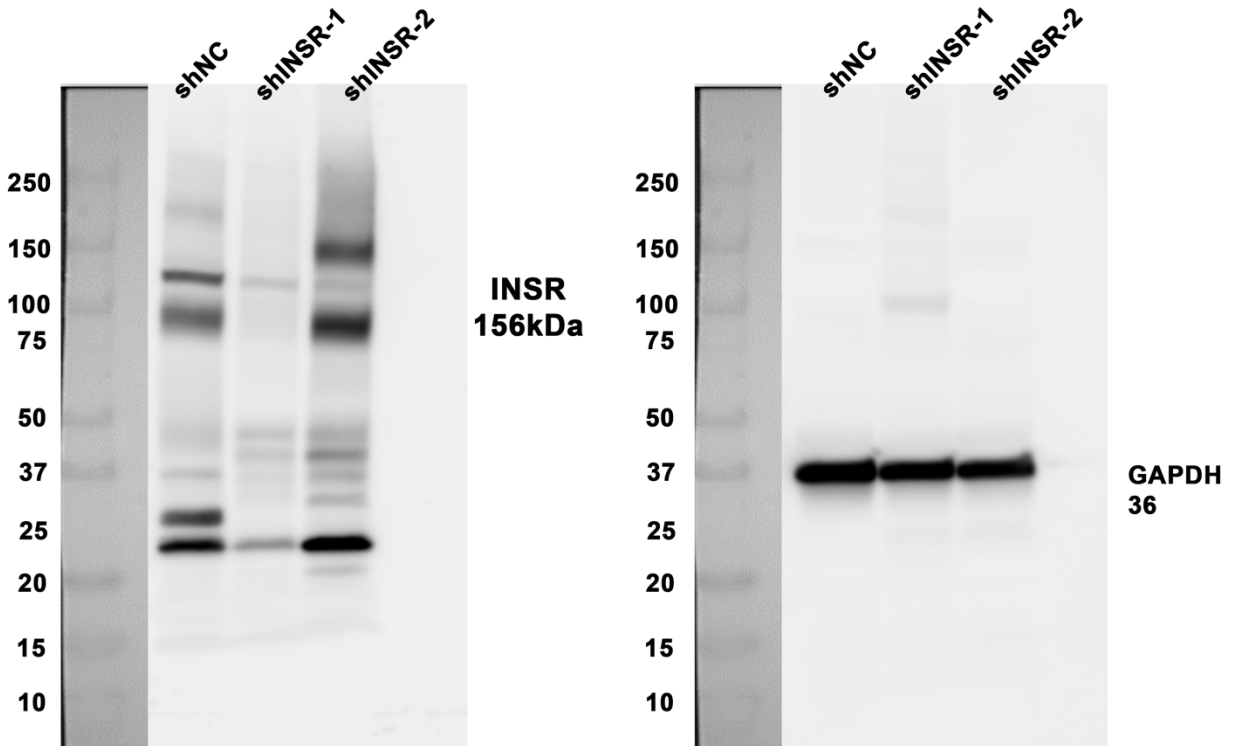

Unedited full blot images for Figure 5b

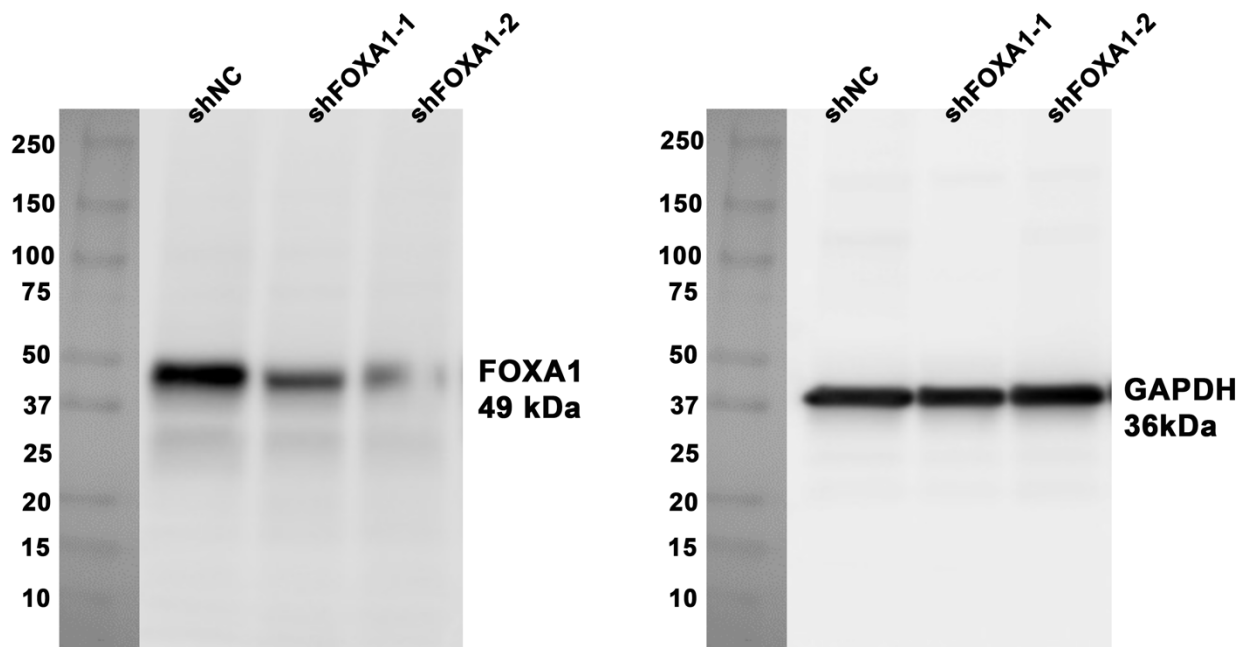

Unedited full blot images for supplementary Figure 2

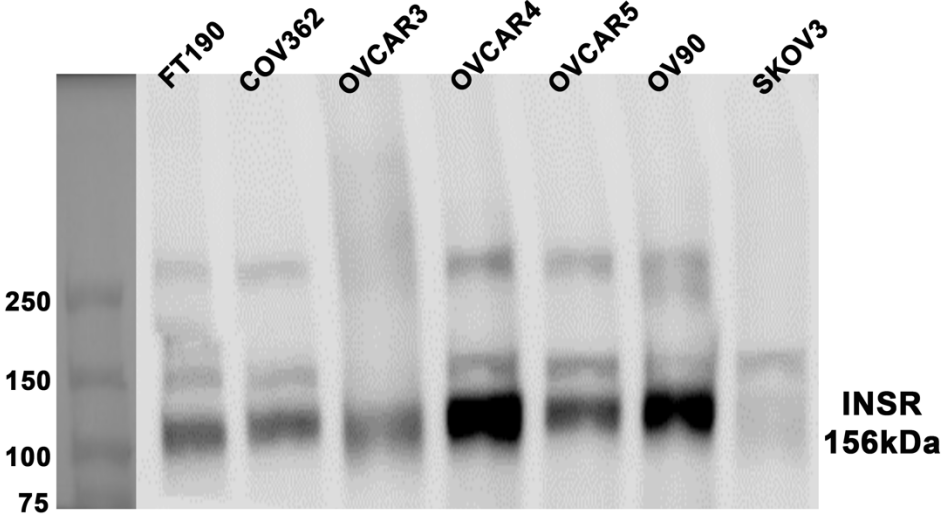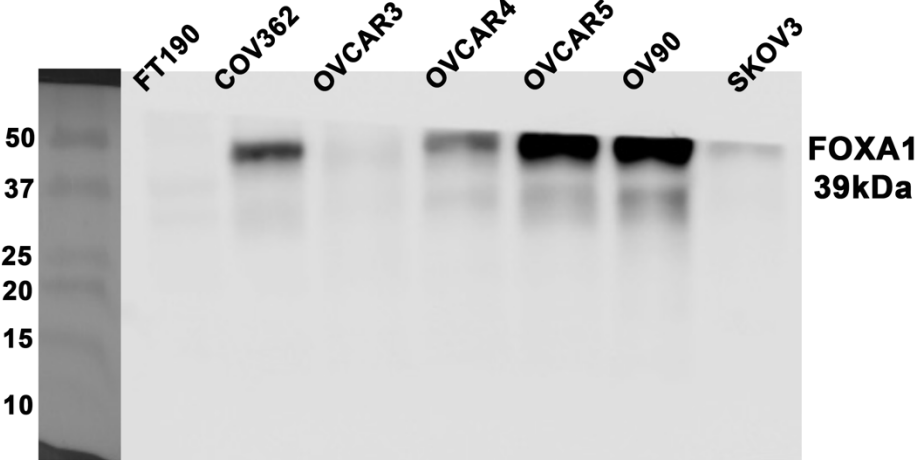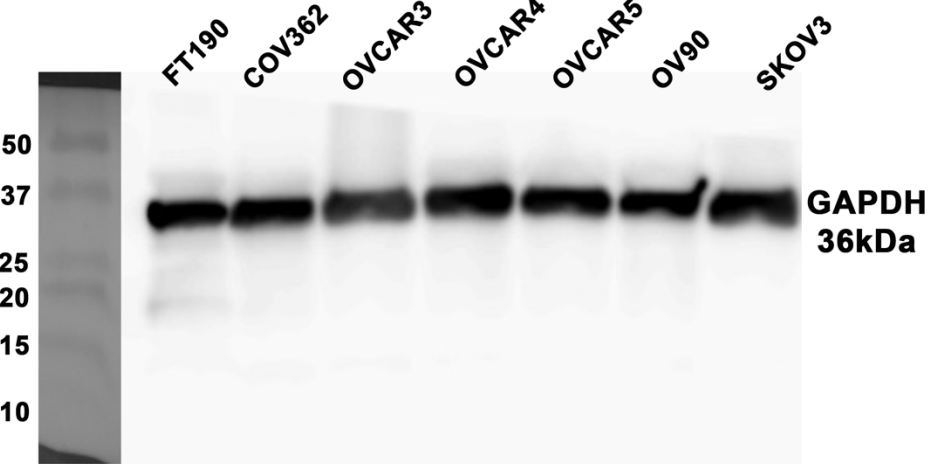

Unedited full blot images for supplementary Figure 3c

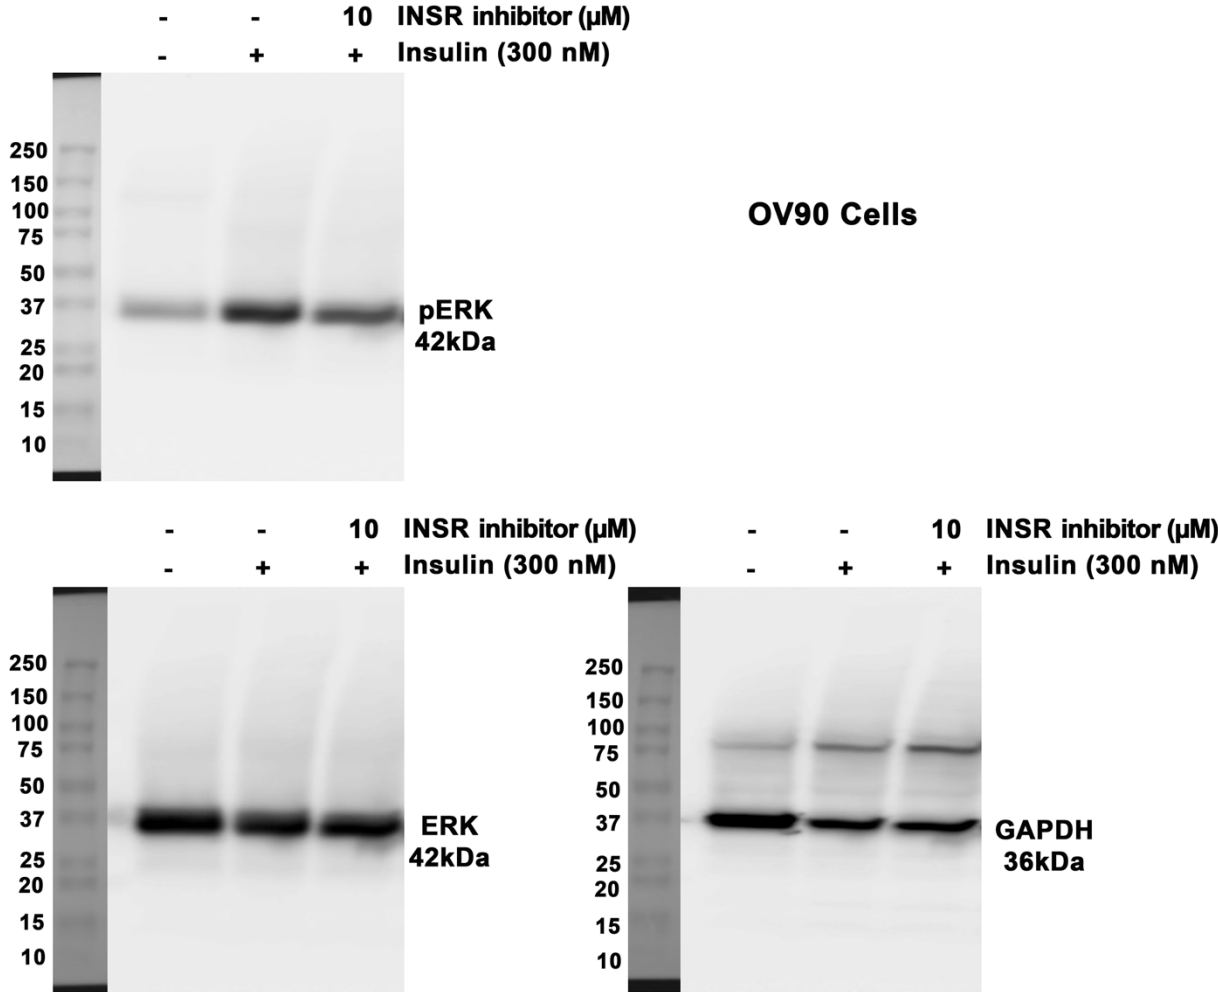

Unedited full blot images for supplementary Figure 3d

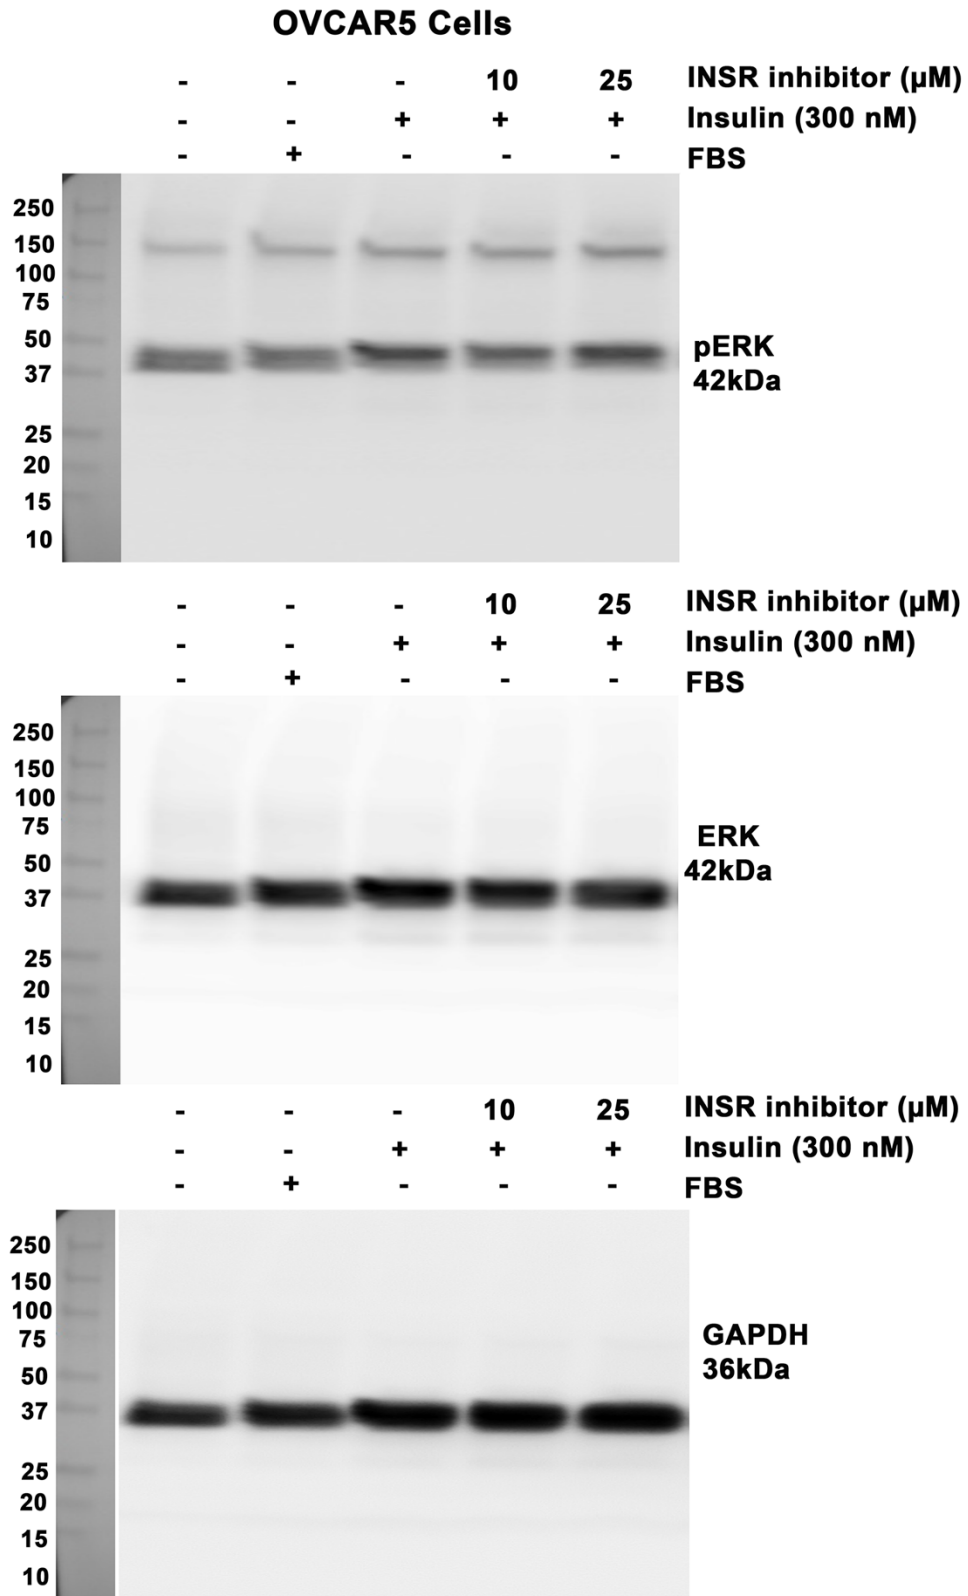

Supplement: MOESM1 [file 41525_2024_448_MOESM1_ESM.pdf]
